# Supplementary material for: Evaluation of the NHS England evidence-based interventions programme: a difference-in-difference analysis
Source: PubMed Central journal article supplement — BMJ Qual Saf. 2022 Apr 7;32(2):90–9. doi: 10.1136/bmjqs-2021-014478 (PMC9887378; doi:10.1136/bmjqs-2021-014478), 2022-04-07
Supplement: bmjqs-2021-014478supp001.pdf [file bmjqs-2021-014478supp001.pdf]

## Evaluation of the NHS England Evidence Based Interventions programme: a difference in difference analysis (Supplementary Material)

### Contents

|                                                                                                                                                                                                     |    |
|-----------------------------------------------------------------------------------------------------------------------------------------------------------------------------------------------------|----|
| Table 1: Procedure and diagnosis codes for phase one of the EBI programme (Treatment Group) .....                                                                                                   | 2  |
| Table 2: Procedure and diagnosis codes for phase two of the EBI programme (Control Group) ..                                                                                                        | 3  |
| Table 3: Procedures under phase one and two of the NHS England Evidence Based Interventions Programme .....                                                                                         | 4  |
| Table 4: Cost per procedure and financial opportunity if activity achieved from baseline* .....                                                                                                     | 5  |
| Figure 1: Trends in EBI treatment and control group procedures (treatment group includes only low-cost procedures) .....                                                                            | 6  |
| Figure 2: Trends in EBI treatment and control group procedures (treatment group includes only high-cost procedures) .....                                                                           | 6  |
| Figure 3: Trends in EBI treatment and control group procedures (treatment group includes all phase one category 2 procedures including removal of benign skin lesions) .....                        | 7  |
| Figure 4: Trends in EBI treatment and control group procedures (treatment group includes all phase one category 1 and 2 procedures with the exception of removal of benign skin lesions) ..         | 7  |
| Table 5a: Descriptive Statistics of Patient Characteristics for Phase One and Phase Two Procedures (Mean and 95% CI)* .....                                                                         | 8  |
| Table 5b: Descriptive Statistics of Patient Characteristics for Phase One and Phase Two Procedures (Mean and 95% CI)* .....                                                                         | 8  |
| Table 6: Number of Procedures for Clinical Commissioning Group and Hospital Characteristics for Phase One and Phase Two of the EBI programme * .....                                                | 9  |
| Table 7: Difference-in-Difference Analysis Results Table for Treatment Group that includes all phase one category 2 procedures including removal of benign skin lesions (%) .....                   | 10 |
| Table 8: Difference-in-Difference Analysis Results Table for Treatment Group that includes all phase one category 1 and 2 procedures with the exception of removal of benign skin lesions (%) ..... | 11 |
| Table 9: Difference-in-Difference Analysis Results Table for Original Treatment Group with Treatment Period Changed to November 2018 (%)* .....                                                     | 12 |
| Table 10: Triple Difference Estimation Results Table for Treatment Group that includes all phase one category 2 procedures including removal of benign skin lesions (%).....                        | 13 |
| Table 11: Triple Difference Estimation Results Table for Treatment Group that includes all phase one category 1 and 2 procedures with the exception of removal of benign skin lesions (%) .....     | 14 |
| Table 12: Triple Difference Estimation Results Table for Original Treatment Group with Treatment Period Changed to November 2018 (%)* .....                                                         | 15 |
| References .....                                                                                                                                                                                    | 16 |

**Table 1: Procedure and diagnosis codes for phase one of the EBI programme (Treatment Group)**

| Procedure                                                  | OPCS codes                                                                                                                                                              | Diagnostic codes                                                                   |
|------------------------------------------------------------|-------------------------------------------------------------------------------------------------------------------------------------------------------------------------|------------------------------------------------------------------------------------|
| A Intervention for snoring (not OSA)                       | F324, F325, F326, Y114, F328                                                                                                                                            | G473*                                                                              |
| B Dilatation & curettage for heavy menstrual bleeding      | Q103, Y113                                                                                                                                                              | O00-O08*, O60-O69*, O70-O75*, N92, N95                                             |
| C Knee arthroscopy with osteoarthritis                     | W821, W822, W823, W828, W829, W851, W852, W853, W858, W859, W831, W832, W833, W834, W835, W836, W837, W838, W839, W841, W842, W843, W844, W861, W879, W901              | M150, M151, M152, M153, M154, M158, M159, M170, M171, M172, M173, M174, M175, M179 |
| D Injection for nonspecific low back pain without sciatica | A521, A522, A528, A529, A577, A735, V544, Z676, Z675, Z993                                                                                                              | M518, M519, M545, M549                                                             |
| E Breast reduction                                         | B311                                                                                                                                                                    | Z853*, D051*, D059*, D486*                                                         |
| G Grommets                                                 | D151, D289                                                                                                                                                              | H652, H653, H661, H662, H663, H664, H669                                           |
| H Tonsillectomy                                            | F341, F342, F343, F344, F345, F346, F347, F348, F349, F361                                                                                                              | G470, G471, G472, G473, G474, G478, G479, J36X                                     |
| I Haemorrhoid surgery                                      | H511, H512, H513, H518, H519                                                                                                                                            |                                                                                    |
| J Hysterectomy for heavy bleeding                          | Q072, Q074, Q078, Q079, Q082, Q088, Q089                                                                                                                                | O00-O08*, O60-O69*, O70-O75*                                                       |
| K Chalazia removal                                         | C121, C122, C124, C191, C198                                                                                                                                            | H001                                                                               |
| L Shoulder decompression                                   | O291                                                                                                                                                                    | M2551, M754                                                                        |
| M Carpal tunnel syndrome release                           | A651, A659                                                                                                                                                              | G560                                                                               |
| N Dupuytren's contracture release                          | T521, T522, T525, T526, T541, T561                                                                                                                                      | M720                                                                               |
| O Ganglion excision                                        | T591, T592, T598, T599, T601, T602, T608, T609                                                                                                                          | M674                                                                               |
| P Trigger finger release                                   | T691, T692, T698, T699, T701, T702, T711, T718, T719, T723, T728, T729, Z894, Z895, Z896, Z897                                                                          | M653, M6530, M6531, M6532, M6533, M6534, M6535, M6536, M6537, M6538, M6539         |
| Q Varicose vein surgery                                    | L832, L838, L839, L841, L842, L843, L844, L845, L846, L848, L849, L851, L852, L853, L858, L859, L861, L862, L868, L869, L871, L872, L873, L874, L875, L876, L877, L878, | I800, I801, I802, I803, I808, I809, I830, I831, I832, I839                         |

|  |  |                                            |  |
|--|--|--------------------------------------------|--|
|  |  | L879 , L881 , L882 , L883 ,<br>L888 , L889 |  |
|--|--|--------------------------------------------|--|

\*Exclude records whereby primary diagnosis code contains this ICD-10 code

**Table 2: Procedure and diagnosis codes for phase two of the EBI programme (Control Group)**

|    | Procedure                            | OPCS codes                                                                                                                                                                                                                                                                                                                                | Diagnostic codes                                   |
|----|--------------------------------------|-------------------------------------------------------------------------------------------------------------------------------------------------------------------------------------------------------------------------------------------------------------------------------------------------------------------------------------------|----------------------------------------------------|
| 2B | Hernia repair                        | T20.1, T20.2, T20.3, T20.4<br>T20.8, T20.9                                                                                                                                                                                                                                                                                                | K40.2, K40.9                                       |
| 2C | Sinus surgery                        | Y76.1, Y76.2, E12.1, E12.2,<br>E12.3, E12.4, E12.8, E12.9,<br>E13.1, E13.2, E13.3, E13.4,<br>E13.5, E13.6, E13.7, E13.8,<br>E13.9, E14.1, E14.2, E14.3,<br>E14.4, E14.5, E14.6, E14.7,<br>E14.8, E14.9, E15.1, E15.2,<br>E15.3, E15.4, E15.8, E15.9,<br>E16.1, E16.2, E16.8, E16.9,<br>E17.1, E17.2, E17.3, E17.4,<br>E17.8, E17.9, E08.1 | J32.0, J32.1, J32.2, J32.3,<br>J32.4, J32.8, J32.9 |
| 2G | Kidney stone surgery                 | M09.4, M09.8, M16.4,<br>M26.1, M26.2, M26.3,<br>M27.1, M27.2, M27.3,<br>M27.8, M28.1, M28.2,<br>M28.3, M28.4, M28.5,<br>M28.8, M28.9                                                                                                                                                                                                      | N20.0, N20.1, N20.2,<br>N20.9                      |
| 2I | Benign prostatic hypertrophy surgery | M61.1, M61.2, M61.3,<br>M61.4, M61.8, M61.9,<br>M64.1, M65.1, M65.2,<br>M65.3, M65.4, M65.5,<br>M65.8, M65.9, M66.1,<br>M66.2, M68.1, M68.3                                                                                                                                                                                               | N40                                                |

**Table 3: Procedures under phase one and two of the NHS England Evidence Based Interventions Programme**

| First phase of EBI programme                                                                                                                                                                                                                                                                                                                                                                                                                                                             | Second phase of EBI programme                                                                                                                                                                                                                                                                                                                                                                                                                                                                                                                                                                                                                                                                                        |
|------------------------------------------------------------------------------------------------------------------------------------------------------------------------------------------------------------------------------------------------------------------------------------------------------------------------------------------------------------------------------------------------------------------------------------------------------------------------------------------|----------------------------------------------------------------------------------------------------------------------------------------------------------------------------------------------------------------------------------------------------------------------------------------------------------------------------------------------------------------------------------------------------------------------------------------------------------------------------------------------------------------------------------------------------------------------------------------------------------------------------------------------------------------------------------------------------------------------|
| Category 1 Interventions                                                                                                                                                                                                                                                                                                                                                                                                                                                                 | Category A Interventions                                                                                                                                                                                                                                                                                                                                                                                                                                                                                                                                                                                                                                                                                             |
| <ul style="list-style-type: none"> <li>• Intervention for snoring (not OSA)</li> <li>• Dilatation &amp; curettage for heavy menstrual bleeding</li> <li>• Knee arthroscopy with osteoarthritis</li> <li>• Injection for nonspecific low back pain without sciatica</li> </ul>                                                                                                                                                                                                            | <ul style="list-style-type: none"> <li>• Diagnostic angiogram</li> <li>• Repair of minimally symptomatic inguinal hernia</li> <li>• Surgical intervention for chronic rhinosinusitis</li> <li>• Adjuvant adenoidectomy for treatment of glue ear</li> <li>• Arthroscopic surgery for meniscal tears</li> <li>• Kidney Stone surgery</li> <li>• Cystoscopy for men with uncomplicated lower urinary tract symptoms (LUTS)</li> <li>• Surgical intervention for Benign Prostatic Hypertrophy (BPH)</li> <li>• Lumbar Discectomy</li> <li>• Radiofrequency facet joint denervation</li> <li>• Exercise electrocardiogram (ECG)</li> <li>• Upper gastrointestinal endoscopy</li> </ul>                                   |
| Category 2 Interventions                                                                                                                                                                                                                                                                                                                                                                                                                                                                 | Category B Interventions                                                                                                                                                                                                                                                                                                                                                                                                                                                                                                                                                                                                                                                                                             |
| <ul style="list-style-type: none"> <li>• Breast reduction</li> <li>• Removal of benign skin lesions</li> <li>• Grommets</li> <li>• Tonsillectomy</li> <li>• Haemorrhoid surgery</li> <li>• Hysterectomy for heavy bleeding</li> <li>• Chalazia removal</li> <li>• Shoulder decompression</li> <li>• Carpal tunnel syndrome release</li> <li>• Dupuytren's contracture release</li> <li>• Ganglion excision</li> <li>• Trigger finger release</li> <li>• Varicose vein surgery</li> </ul> | <ul style="list-style-type: none"> <li>• Colonoscopy in the management of hereditary colorectal cancer</li> <li>• Repeat colonoscopy</li> <li>• ERCP in acute gallstone pancreatitis without cholangitis</li> <li>• Cholecystectomy</li> <li>• Appendicectomy without confirmation of appendicitis</li> <li>• Low back pain imaging</li> <li>• Knee MRI when symptoms are suggestive of osteoarthritis</li> <li>• Knee MRI for suspected meniscal tears</li> <li>• Vertebral augmentation for painful osteoporotic vertebral fractures</li> <li>• Scans for Shoulder Pain and Guided Injections</li> <li>• MRI scan of the hip for arthritis</li> <li>• Fusion surgery for mechanical axial low back pain</li> </ul> |
|                                                                                                                                                                                                                                                                                                                                                                                                                                                                                          | Category C Interventions                                                                                                                                                                                                                                                                                                                                                                                                                                                                                                                                                                                                                                                                                             |
|                                                                                                                                                                                                                                                                                                                                                                                                                                                                                          | <ul style="list-style-type: none"> <li>• Helmet therapy for treatment of positional plagiocephaly/brachycephaly in children</li> <li>• Pre-operative chest x-ray</li> <li>• Pre-operative ECG</li> <li>• Prostate-specific antigen (PSA) test</li> <li>• Liver function, creatinine kinase and lipid level tests</li> <li>• Blood transfusion</li> </ul>                                                                                                                                                                                                                                                                                                                                                             |

Source: NHS England Evidence Based Interventions Programme<sup>1,2</sup>**Table 4: Cost per procedure and financial opportunity if activity achieved from baseline\***

| Intervention                                                   | Baseline FY 2017/18 | Cost per procedure | Proposed Goal  | Total financial opportunity (if goal activity achieved from baseline) |
|----------------------------------------------------------------|---------------------|--------------------|----------------|-----------------------------------------------------------------------|
| A Surgery for snoring without obstructive sleep apnoea         | 827                 | £ 973              | 0              | £ 804,671.00                                                          |
| B D&C for heavy menstrual bleeding                             | 231                 | £ 985              | 0              | £ 227,535.00                                                          |
| C Knee arthroscopy with osteoarthritis                         | 4,943               | £ 2,682            | 0              | £ 13,257,126.00                                                       |
| D Injections for non-specific lower back pain without sciatica | 19,444              | £ 589              | 0              | £ 11,452,516.00                                                       |
| <b>Cat 1 total</b>                                             | <b>25,445</b>       |                    | <b>0</b>       |                                                                       |
| E Breast reduction                                             | 988                 | £ 2,701            | 391            | £ 1,613,277.36                                                        |
| F Removal of benign skin lesions                               | 99,475              | £ 626              | 61,720         | £ 23,634,905.96                                                       |
| G Grommets                                                     | 8,661               | £ 727              | 5,415          | £ 2,360,066.69                                                        |
| H Tonsillectomy                                                | 32,198              | £ 1,172            | 24,951         | £ 8,493,145.65                                                        |
| I Haemorrhoid surgery                                          | 8,517               | £ 1,018            | 5,775          | £ 2,791,399.99                                                        |
| J Hysterectomy for heavy menstrual bleeding                    | 18,523              | £ 2,941            | 14,068         | £ 13,101,655.67                                                       |
| K Chalazia removal                                             | 6,007               | £ 528              | 1,630          | £ 2,311,318.67                                                        |
| L Shoulder decompression                                       | 13,647              | £ 3,311            | 6,941          | £ 22,203,480.15                                                       |
| M Carpal tunnel syndrome release                               | 43,856              | £ 1,204            | 28,902         | £ 18,004,405.88                                                       |
| N Dupuytren's contracture release                              | 14,938              | £ 2,613            | 10,264         | £ 12,213,245.57                                                       |
| O Ganglion excision                                            | 6,222               | £ 1,212            | 3,641          | £ 3,128,749.70                                                        |
| P Trigger finger release                                       | 7,768               | £ 1,231            | 5,102          | £ 3,281,592.07                                                        |
| Q Varicose vein surgery                                        | 28,776              | £ 1,051            | 20,363         | £ 8,842,041.84                                                        |
| <b>Cat 2 total</b>                                             | <b>289,576</b>      |                    | <b>189,162</b> |                                                                       |
| <b>Cat 1 &amp; 2 total</b>                                     | <b>315,021</b>      |                    | <b>189,162</b> |                                                                       |

Source: Provided by NHS England Evidence Based Interventions Team

**Figure 1: Trends in EBI treatment and control group procedures (treatment group includes only low-cost procedures)**

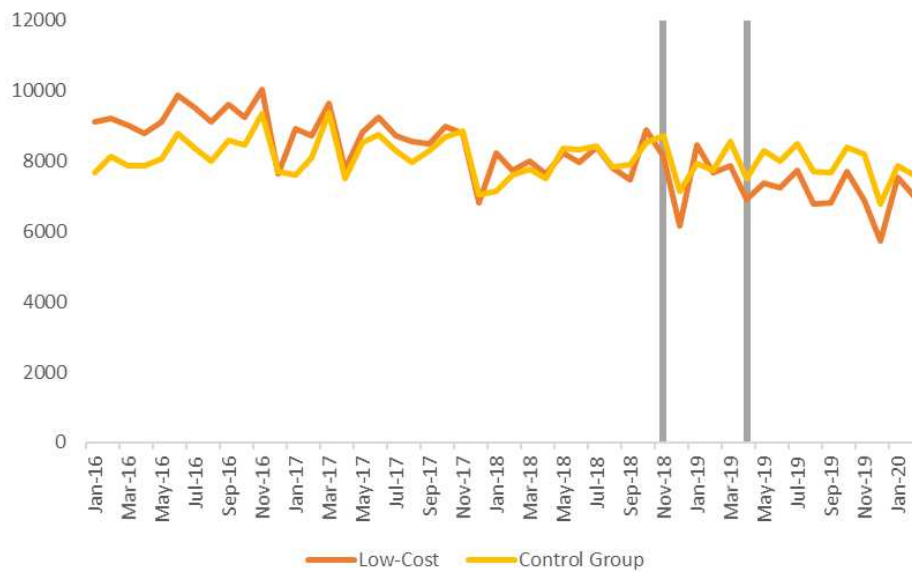

**Figure 2: Trends in EBI treatment and control group procedures (treatment group includes only high-cost procedures)**

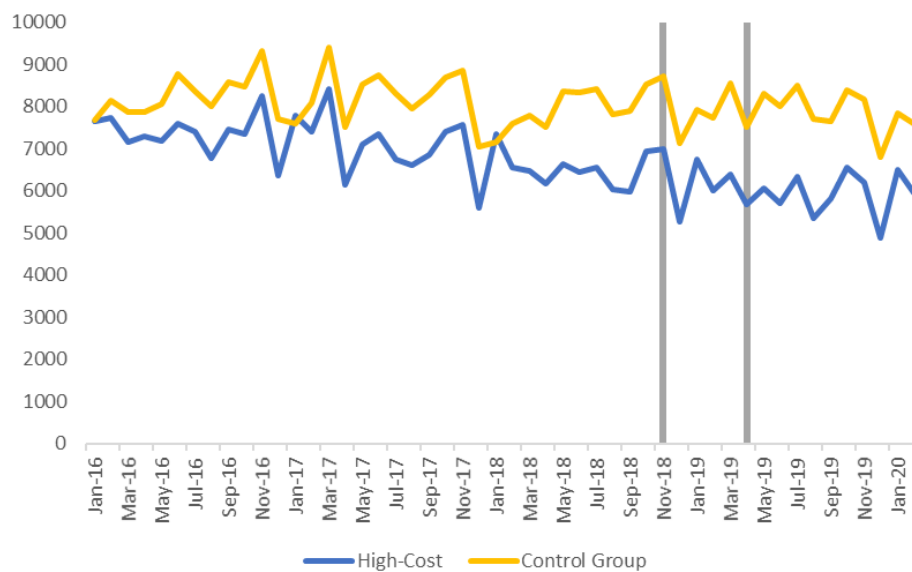

**Figure 3: Trends in EBI treatment and control group procedures (treatment group includes all phase one category 2 procedures including removal of benign skin lesions)**

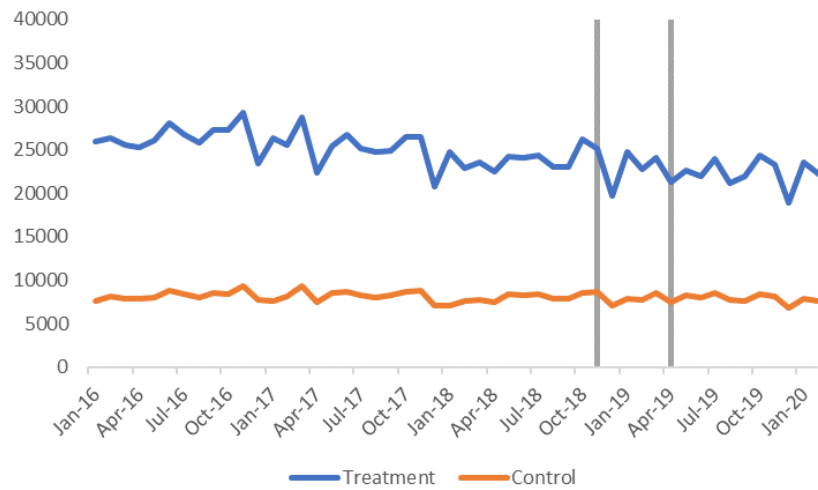

**Figure 4: Trends in EBI treatment and control group procedures (treatment group includes all phase one category 1 and 2 procedures with the exception of removal of benign skin lesions)**

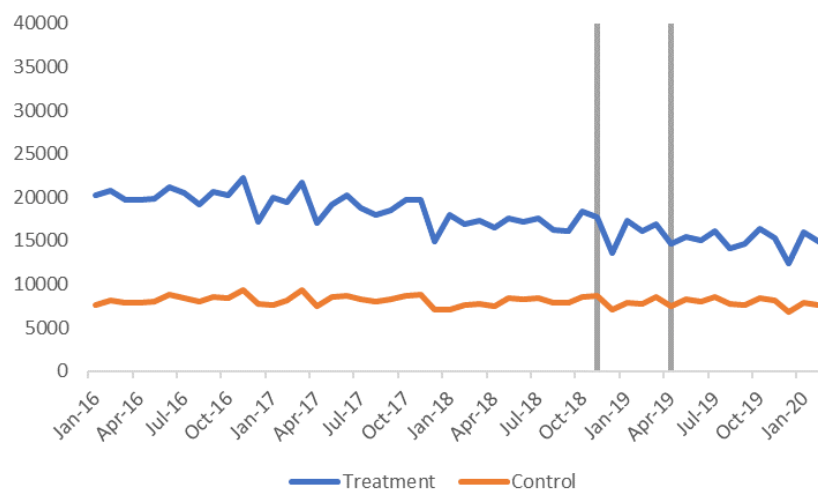

**Table 5a: Descriptive Statistics of Patient Characteristics for Phase One and Phase Two Procedures (Mean and 95% CI)\***

|                                  | Gender (Female=1)    |                      |                        | Age                     |                         |                      |
|----------------------------------|----------------------|----------------------|------------------------|-------------------------|-------------------------|----------------------|
|                                  | Before EBI           | After EBI            | Difference             | Before EBI              | After EBI               | Difference           |
| Phase One Procedures (Treatment) |                      |                      |                        |                         |                         |                      |
| Category 1                       | 0.62<br>(0.62, 0.63) | 0.62<br>(0.61, 0.63) | -0.01<br>(-0.02, 0.00) | 65.59<br>(65.47, 65.72) | 67.01<br>(66.68, 67.34) | 1.42<br>(1.07, 1.77) |
| Category 2                       | 0.60 (0.60, 0.60)    | 0.60<br>(0.60, 0.60) | 0.00<br>(-0.00, 0.00)  | 57.56<br>(57.51, 57.62) | 58.61<br>(58.50, 58.72) | 1.05<br>(0.92, 1.17) |
| Phase Two Procedures (Control)   |                      |                      |                        |                         |                         |                      |
| Total                            | 0.15 (0.15, 0.15)    | 0.15<br>(0.15, 0.15) | 0.00<br>(0.00, 0.01)   | 67.14<br>(67.07, 67.21) | 67.92<br>(67.79, 68.06) | 0.79<br>(0.64, 0.94) |

\*Before the implementation of EBI covers the period Jan 1<sup>st</sup> 2016-March 31<sup>st</sup> 2019, and after EBI covers the period April 1<sup>st</sup> 2019-Feb 28<sup>th</sup> 2020

**Table 5b: Descriptive Statistics of Patient Characteristics for Phase One and Phase Two Procedures (Mean and 95% CI)\***

|                                  | IMD Score               |                         |                         | Charlson             |                      |                      |
|----------------------------------|-------------------------|-------------------------|-------------------------|----------------------|----------------------|----------------------|
|                                  | Before EBI              | Before EBI              | Difference              | Before EBI           | After EBI            | Difference           |
| Phase One Procedures (Treatment) |                         |                         |                         |                      |                      |                      |
| Category 1                       | 22.23<br>(22.12, 22.33) | 21.96<br>(21.70-22.21)  | -0.27<br>(-0.55, 0.01)  | 0.39<br>(0.39, 0.40) | 0.48<br>(0.46, 0.49) | 0.09<br>(0.07, 0.10) |
| Category 2                       | 22.08<br>(22.04, 22.12) | 21.96<br>(21.89, 22.04) | -0.11<br>(-0.20, -0.03) | 0.28<br>(0.28, 0.29) | 0.32<br>(0.32, 0.33) | 0.04<br>(0.04, 0.04) |
| Phase Two Procedures (Control)   |                         |                         |                         |                      |                      |                      |
| Total                            | 20.42<br>(20.37, 20.26) | 20.35<br>(20.25, 20.45) | 0.07<br>(-0.18, 0.04)   | 0.43<br>(0.43, 0.43) | 0.48<br>(0.48, 0.49) | 0.05<br>(0.05, 0.06) |

\*Before the implementation of EBI covers the period Jan 1<sup>st</sup> 2016-March 31<sup>st</sup> 2019, and after EBI covers the period April 1<sup>st</sup> 2019-Feb 28<sup>th</sup> 2020



**Table 6: Number of Procedures for Clinical Commissioning Group and Hospital Characteristics for Phase One and Phase Two of the EBI programme \***

|                                | CCG Deficit<br>(FY 2018/19) |                    | CCG Demonstrator   |                    | NHS vs ISP Hospital |                    |
|--------------------------------|-----------------------------|--------------------|--------------------|--------------------|---------------------|--------------------|
| Number of CCGs or Hospitals    |                             |                    |                    |                    |                     |                    |
|                                | Yes                         | No                 | Yes                | No                 | NHS                 | ISP                |
|                                | 38<br>(28.1%)               | 97<br>(71.9%)      | 48<br>(35.6%)      | 87<br>(64.4%)      | 162<br>(41.8%)      | 226<br>(58.2%)     |
| Number of Low-value Procedures |                             |                    |                    |                    |                     |                    |
| Phase 1 Procedures (Treatment) |                             |                    |                    |                    |                     |                    |
| Category 1                     | 41,344<br>(41.9%)           | 57,293<br>(58.1%)  | 30,630<br>(31.1%)  | 68,007<br>(68.9%)  | 82,178<br>(83.0%)   | 16,814<br>(17.0%)  |
| Category 2                     | 289,676<br>(37.0%)          | 494,181<br>(63.0%) | 283,973<br>(36.2%) | 499,884<br>(63.8%) | 644,776<br>(81.8%)  | 143,567<br>(18.2%) |
| Total                          | 331,020<br>(37.5%)          | 551,474<br>(62.5%) | 314,603<br>(35.6%) | 567,891<br>(64.4%) | 726,954<br>(81.9%)  | 160,381<br>(18.1%) |
| Phase 2 Procedures (Control)   |                             |                    |                    |                    |                     |                    |
| Total                          | 160,701<br>(39.0%)          | 251,288<br>(61.0%) | 144,901<br>(35.6%) | 267,088<br>(64.8%) | 321,159<br>(79.5%)  | 82,720<br>(20.5%)  |

\*Percentage in parentheses indicates the proportion of low-value procedures undertaken between January 1<sup>st</sup> 2016 and February 28<sup>th</sup> 2020. This table was created by the co-authors of this manuscript.

**Table 7: Difference-in-Difference Analysis Results Table for Treatment Group that includes all phase one category 2 procedures including removal of benign skin lesions (%)**

|                         | Model 1<br>(Standard<br>DiD) | Model 2<br>(Standard<br>DiD)   | Model 3<br>(High Cost<br>Procedures) | Model 4<br>(Low Cost<br>Procedures) | Model 5<br>(Time Trend<br>Analysis) | Model 6<br>(Combinatio<br>n) |
|-------------------------|------------------------------|--------------------------------|--------------------------------------|-------------------------------------|-------------------------------------|------------------------------|
| Phase1                  | 0.38***<br>(0.37,0.39)       | 0.38***<br>(0.37,0.39)         | 0.51***<br>(0.50,0.53)               | 0.92***<br>(0.89,0.94)              | 0.37***<br>(0.36,0.38)              | 0.37***<br>(0.36,0.38)       |
| EBI                     | -8.46***<br>(-9.43,-7.49)    | -9.34***<br>(-10.74,-<br>7.94) | -6.04***<br>(-7.56,-4.53)            | -11.21***<br>(-13.00,-<br>9.42)     | -                                   | -4.25***<br>(-6.30,-2.20)    |
| EBI x<br>Phase1         | 0.04***<br>(0.04,0.05)       | 0.04***<br>(0.04,0.05)         | 0.03***<br>(0.03,0.04)               | 0.18***<br>(0.16,0.19)              | -                                   | 0.02***<br>(0.01,0.03)       |
| t                       | -                            | -                              | -                                    | -                                   | -0.19***<br>(-0.29,-0.09)           | -0.15**<br>(-0.26,-0.05)     |
| t ≥ EBI                 | -                            | -                              | -                                    | -                                   | -0.61***<br>(-0.87,-0.35)           | -0.21<br>(-0.53,0.11)        |
| t x Phase1              | -                            | -                              | -                                    | -                                   | 0.00***<br>(0.00,0.00)              | 0.00***<br>(0.00,0.00)       |
| t ≥ EBI x<br>Phase1     | -                            | -                              | -                                    | -                                   | 0.00**<br>(0.00,0.00)               | 0.00<br>(-0.00,0.00)         |
| Year<br>Dummies         | No                           | Yes                            | Yes                                  | Yes                                 | Yes                                 | Yes                          |
| Month<br>Dummies        | No                           | Yes                            | Yes                                  | Yes                                 | Yes                                 | Yes                          |
| Controls                | No                           | Yes                            | Yes                                  | Yes                                 | Yes                                 | Yes                          |
| Constant                | 4.56***<br>(4.54,4.58)       | 4.36***<br>(4.25,4.47)         | 4.10***<br>(3.99,4.22)               | 3.85***<br>(3.75,3.96)              | 4.39***<br>(4.27,4.50)              | 4.38***<br>(4.27,4.50)       |
| Observation<br>s        | 6750                         | 6750                           | 6750                                 | 6750                                | 6750                                | 6750                         |
| Units of<br>Observation | 135 CCGs                     | 135 CCGs                       | 135 CCGs                             | 135 CCGs                            | 135 CCGs                            | 135 CCGs                     |

Co-efficients are reported as percentages, and can be understood as follows: *Phase1* is the percentage difference in change in volumes between the treatment and control group. *EBI* is the percentage difference in volumes for all procedures before and after the implementation of the EBI programme. In Models 1-4, *EBI x Phase1* represents the treatment effect of the EBI programme and is the percentage difference in difference of volumes before and after implementation between the treatment and control group. In Model 6, *EBI x Phase1* is the percentage difference in changes in volumes between the treatment and control group during implementation of the EBI programme. *t* reflects monthly percentage change in volumes for all procedures. *t ≥ EBI* reflects the monthly percentage change in volumes for all procedures after the implementation of the EBI programme. *t ≥ EBI x Phase1* reflects the difference in differences in the monthly percentage change in volumes between the treatment and group control after the implementation of the EBI programme. 95% Confidence intervals are contained in parentheses, \*\*\* p<0.001, \*\* p<0.01, \* p<0.05, - = Not applicable to this model, All models used fixed effects therefore errors are clustered at the CCG level. This table was created by the co-authors of this manuscript.

**Table 8: Difference-in-Difference Analysis Results Table for Treatment Group that includes all phase one category 1 and 2 procedures with the exception of removal of benign skin lesions (%)**

|                         | Model 1<br>(Standard<br>DiD)     | Model 2<br>(Standard<br>DiD)     | Model 3<br>(High Cost<br>Procedures) | Model 4<br>(Low Cost<br>Procedures) | Model 5<br>(Time Trend<br>Analysis) | Model 6<br>(Combinatio<br>n) |
|-------------------------|----------------------------------|----------------------------------|--------------------------------------|-------------------------------------|-------------------------------------|------------------------------|
| Phase1                  | 0.46***<br>(0.45,0.47)           | 0.46***<br>(0.45,0.47)           | 0.67***<br>(0.65,0.69)               | 0.68***<br>(0.66,0.70)              | 0.44***<br>(0.43,0.45)              | 0.44***<br>(0.43,0.45)       |
| EBI                     | -15.06***<br>(-16.12,-<br>14.00) | -15.43***<br>(-16.94,-<br>13.92) | -13.53***<br>(-15.26,-<br>11.80)     | -15.34***<br>(-17.10,-<br>13.58)    | -                                   | -5.97***<br>(-8.15,-3.79)    |
| EBI x<br>Phase1         | 0.11***<br>(0.10,0.12)           | 0.11***<br>(0.10,0.12)           | 0.19***<br>(0.17,0.21)               | 0.20***<br>(0.18,0.22)              | -                                   | 0.05***<br>(0.04,0.06)       |
| t                       | -                                | -                                | -                                    | -                                   | -0.40***<br>(-0.50,-0.30)           | -0.35***<br>(-0.46,-0.24)    |
| t ≥ EBI                 | -                                | -                                | -                                    | -                                   | -0.91***<br>(-1.19,-0.63)           | -0.30<br>(-0.64,0.04)        |
| t x Phase1              | -                                | -                                | -                                    | -                                   | 0.00***<br>(0.00,0.00)              | 0.00***<br>(0.00,0.00)       |
| t ≥ EBI x<br>Phase1     | -                                | -                                | -                                    | -                                   | 0.01***<br>(0.00,0.01)              | 0.00<br>(-0.00,0.00)         |
| Year<br>Dummies         | No                               | Yes                              | Yes                                  | Yes                                 | Yes                                 | Yes                          |
| Month<br>Dummies        | No                               | Yes                              | Yes                                  | Yes                                 | Yes                                 | Yes                          |
| Controls                | No                               | Yes                              | Yes                                  | Yes                                 | Yes                                 | Yes                          |
| Constant                | 4.43***<br>(4.41,4.44)           | 4.22***<br>(4.11,4.33)           | 3.93***<br>(3.81,4.05)               | 3.95***<br>(3.85,4.05)              | 4.27***<br>(4.16,4.38)              | 4.26***<br>(4.15,4.37)       |
| Observation<br>s        | 6750                             | 6750                             | 6750                                 | 6750                                | 6750                                | 6750                         |
| Units of<br>Observation | 135 CCGs                         | 135 CCGs                         | 135 CCGs                             | 135 CCGs                            | 135 CCGs                            | 135 CCGs                     |

Co-efficients are reported as percentages, and can be understood as follows: *Phase1* is the percentage difference in change in volumes between the treatment and control group. *EBI* is the percentage difference in volumes for all procedures before and after the implementation of the EBI programme. In Models 1-4, *EBI x Phase1* represents the treatment effect of the EBI programme and is the percentage difference in difference of volumes before and after implementation between the treatment and control group. In Model 6, *EBI x Phase1* is the percentage difference in changes in volumes between the treatment and control group during implementation of the EBI programme. *t* reflects monthly percentage change in volumes for all procedures. *t ≥ EBI* reflects the monthly percentage change in volumes for all procedures after the implementation of the EBI programme. *t ≥ EBI x Phase1* reflects the difference in differences in the monthly percentage change in volumes between the treatment and group control after the implementation of the EBI programme. 95% Confidence intervals are contained in parentheses, \*\*\* p<0.001, \*\* p<0.01, \* p<0.05, - = Not applicable to this model, All models used fixed effects therefore errors are clustered at the CCG level. This table was created by the co-authors of this manuscript.

**Table 9: Difference-in-Difference Analysis Results Table for Original Treatment Group with Treatment Period Changed to November 2018 (%)\***

|                         | Model 1<br>(Standard<br>DiD)    | Model 2<br>(Standard<br>DiD)     | Model 3<br>(High Cost<br>Procedures) | Model 4<br>(Low Cost<br>Procedures) | Model 5<br>(Time Trend<br>Analysis) | Model 6<br>(Combinatio<br>n) |
|-------------------------|---------------------------------|----------------------------------|--------------------------------------|-------------------------------------|-------------------------------------|------------------------------|
| Phase1                  | 0.54***<br>(0.53,0.55)          | 0.55***<br>(0.54,0.56)           | 0.91***<br>(0.88,0.94)               | 0.91***<br>(0.88,0.93)              | 0.54***<br>(0.52,0.55)              | 0.54***<br>(0.52,0.55)       |
| EBI                     | -10.71***<br>(-11.65,-<br>9.77) | -13.75***<br>(-15.45,-<br>12.05) | -11.58***<br>(-13.57,-<br>9.59)      | -12.54***<br>(-14.56,-<br>10.52)    | -                                   | -6.22***<br>(-8.31,-4.13)    |
| EBI x<br>Phase1         | 0.09***<br>(0.08,0.10)          | 0.09***<br>(0.08,0.010)          | 0.13***<br>(0.12,0.15)               | 0.15***<br>(0.13,0.17)              | -                                   | 0.02**<br>(0.01,0.03)        |
| t                       | -                               | -                                | -                                    | -                                   | -0.20***<br>(-0.31,-0.10)           | -0.10<br>(-0.22,0.01)        |
| t ≥ EBI                 | -                               | -                                | -                                    | -                                   | -0.76***<br>(-0.98,-0.54)           | -0.70***<br>(-0.93,-0.47)    |
| t x Phase1              | -                               | -                                | -                                    | -                                   | 0.00***<br>(0.00,0.00)              | 0.00***<br>(0.00,0.00)       |
| t ≥ EBI x<br>Phase1     | -                               | -                                | -                                    | -                                   | 0.00***<br>(0.00,0.01)              | 0.00***<br>(0.00,0.01)       |
| Year<br>Dummies         | No                              | Yes                              | Yes                                  | Yes                                 | Yes                                 | Yes                          |
| Month<br>Dummies        | No                              | Yes                              | Yes                                  | Yes                                 | Yes                                 | Yes                          |
| Controls                | No                              | Yes                              | Yes                                  | Yes                                 | Yes                                 | Yes                          |
| Constant                | 4.32***<br>(4.30,4.33)          | 4.19***<br>(4.08,4.30)           | 3.93***<br>(3.81,4.05)               | 3.87***<br>(3.76,3.97)              | 4.21***<br>(4.10,4.32)              | 4.22***<br>(4.10,4.33)       |
| Observation<br>s        | 6750                            | 6750                             | 6750                                 | 6750                                | 6750                                | 6750                         |
| Units of<br>Observation | 135 CCGs                        | 135 CCGs                         | 135 CCGs                             | 135 CCGs                            | 135 CCGs                            | 135 CCGs                     |

Co-efficients are reported as percentages, and can be understood as follows: *Phase1* is the percentage difference in change in volumes between the treatment and control group. *EBI* is the percentage difference in volumes for all procedures before and after the implementation of the EBI programme. In Models 1-4, *EBI x Phase1* represents the treatment effect of the EBI programme and is the percentage difference in difference of volumes before and after implementation between the treatment and control group. In Model 6, *EBI x Phase1* is the percentage difference in changes in volumes between the treatment and control group during implementation of the EBI programme. *t* reflects monthly percentage change in volumes for all procedures. *t ≥ EBI* reflects the monthly percentage change in volumes for all procedures after the implementation of the EBI programme. *t ≥ EBI x Phase1* reflects the difference in differences in the monthly percentage change in volumes between the treatment and group control after the implementation of the EBI programme. 95% Confidence intervals are contained in parentheses, \*\*\* p<0.001, \*\* p<0.01, \* p<0.05, - = Not applicable to this model, All models used fixed effects therefore errors are clustered at the CCG level. This table was created by the co-authors of this manuscript. \*November 2018 is when the NHS England Evidence Based Interventions Programme Statutory Guidance was published

**Table 10: Triple Difference Estimation Results Table for Treatment Group that includes all phase one category 2 procedures including removal of benign skin lesions (%)**

|                         | Model 1<br>(CCG Deficit)     | Model 2<br>(CCG<br>Demonstrator) | Model 3<br>(NHS hospitals) |
|-------------------------|------------------------------|----------------------------------|----------------------------|
| Phase1                  | 0.48***<br>(0.46,0.49)       | 0.39***<br>(0.38,0.40)           | 3.10***<br>(3.02,3.17)     |
| EBI                     | -11.38***<br>(-12.94,-9.826) | -8.52***<br>(-10.09,-6.96)       | -9.08***<br>(-11.78,-6.39) |
| EBI x Phase1            | 0.07***<br>(0.06,0.07)       | 0.03***<br>(0.03,0.04)           | 0.29***<br>(0.24,0.35)     |
| EBI x X                 | 3.19**<br>(1.13,5.25)        | -2.59*<br>(-4.61,-0.56)          | -2.75<br>(-6.57,1.08)      |
| Phase1 x X              | -0.21***<br>(-0.23,-0.20)    | -0.02*<br>(-0.04,-0.00)          | -2.57***<br>(-2.65,-2.49)  |
| EBI x Phase1 x X        | -0.04***<br>(-0.05,-0.03)    | 0.02***<br>(0.01,0.03)           | -0.23***<br>(-0.29,-0.17)  |
| Constant                | 4.31***<br>(4.21,4.42)       | 4.36***<br>(4.24,4.47)           | 3.08***<br>(3.00,3.16)     |
| Observations            | 6750                         | 6750                             | 16559                      |
| Unit of<br>Observations | 135 CCGs                     | 135 CCGs                         | 382 Hospitals              |

Co-efficients are reported as percentages, and can be understood as follows: *Phase1* is the percentage difference in change in volumes between the treatment and control group. *EBI* is the percentage difference in volumes for all procedures before and after the implementation of the EBI programme. *EBI x Phase1* is the percentage difference in difference of volumes before and after the implementation of the EBI programme between the treatment and control group. *EBI x X* is the average percentage difference in difference in volumes for all procedures before and after the implementation of the EBI programme between different organisational characteristics defined by *X*. *Phase1 x X* is average percentage difference in changes in volumes for the treatment group for different organisational characteristics defined by *X*. *EBI x Phase1 x X* is the average percentage difference in difference in volumes before and after the implementation of the EBI programme for the treatment group between different organisational characteristics defined by *X*. In Model 1, *X* is 1 for CCGs which posted in financial year 2018/19, and 0 for those which did not. In Model 2, *X* is 1 for CCGs which were part of the demonstrator community, and 0 for those which were not. In Model 3, *X* is 1 for NHS hospitals and 0 for independent sector providers. 95% Confidence intervals in parentheses, \*\*\*  $p < 0.001$ , \*\*  $p < 0.01$ , \*  $p < 0.05$ . All models used fixed effects therefore errors are clustered at the CCG or hospital level. This table was created by the co-authors of this manuscript.

**Table 11: Triple Difference Estimation Results Table for Treatment Group that includes all phase one category 1 and 2 procedures with the exception of removal of benign skin lesions (%)**

|                         | Model 1<br>(CCG Deficit)     | Model 2<br>(CCG<br>Demonstrator) | Model 3<br>(NHS hospitals)   |
|-------------------------|------------------------------|----------------------------------|------------------------------|
| Phase1                  | 0.62***<br>(0.60,0.63)       | 0.45***<br>(0.44,0.47)           | 3.17***<br>(3.09,3.26)       |
| EBI                     | -15.66***<br>(-17.31,-14.01) | -15.23***<br>(-16.96,-13.50)     | -13.63***<br>(-16.52,-10.74) |
| EBI x Phase1            | 0.14***<br>(0.13,0.15)       | 0.11***<br>(0.10,0.12)           | 0.59***<br>(0.50,0.67)       |
| EBI x X                 | 2.64*<br>(0.42,4.86)         | -0.56<br>(-2.73,1.61)            | -2.9<br>(-7.02,1.24)         |
| Phase1 x X              | -0.30***<br>(-0.32,-0.28)    | 0.01<br>(-0.01,0.03)             | -2.45***<br>(-2.54,-2.36)    |
| EBI x Phase1 x X        | -0.07***<br>(-0.09,-0.05)    | 0.00<br>(-0.02,0.02)             | -0.43***<br>(-0.52,-0.34)    |
| Constant                | 4.19***<br>(4.09,4.29)       | 4.22***<br>(4.11,4.33)           | 2.97***<br>(2.88,3.05)       |
| Observations            | 6750                         | 6750                             | 16559                        |
| Unit of<br>Observations | 135 CCGs                     | 135 CCGs                         | 382 Hospitals                |

Co-efficients are reported as percentages, and can be understood as follows: *Phase1* is the percentage difference in change in volumes between the treatment and control group. *EBI* is the percentage difference in volumes for all procedures before and after the implementation of the EBI programme. *EBI x Phase1* is the percentage difference in difference of volumes before and after the implementation of the EBI programme between the treatment and control group. *EBI x X* is the average percentage difference in difference in volumes for all procedures before and after the implementation of the EBI programme between different organisational characteristics defined by *X*. *Phase1 x X* is average percentage difference in changes in volumes for the treatment group for different organisational characteristics defined by *X*. *EBI x Phase1 x X* is the average percentage difference in difference in volumes before and after the implementation of the EBI programme for the treatment group between different organisational characteristics defined by *X*. In Model 1, *X* is 1 for CCGs which posted in financial year 2018/19, and 0 for those which did not. In Model 2, *X* is 1 for CCGs which were part of the demonstrator community, and 0 for those which were not. In Model 3, *X* is 1 for NHS hospitals and 0 for independent sector providers. 95% Confidence intervals in parentheses, \*\*\*  $p < 0.001$ , \*\*  $p < 0.01$ , \*  $p < 0.05$ . All models used fixed effects therefore errors are clustered at the CCG or hospital level. This table was created by the co-authors of this manuscript.

**Table 12: Triple Difference Estimation Results Table for Original Treatment Group with Treatment Period Changed to November 2018 (%)\***

|                         | Model 1<br>(CCG Deficit)     | Model 2<br>(CCG<br>Demonstrator) | Model 3<br>(NHS hospitals) |
|-------------------------|------------------------------|----------------------------------|----------------------------|
| Phase1                  | 0.68***<br>(0.66,0.70)       | 0.57***<br>(0.56,0.59)           | 3.87***<br>(3.77,3.97)     |
| EBI                     | -14.11***<br>(-15.90,-12.32) | -13.31***<br>(-15.16,-11.47)     | -6.03***<br>(-9.20,-2.85)  |
| EBI x Phase1            | 0.11***<br>(0.10,0.12)       | 0.09***<br>(0.08,0.10)           | 0.34***<br>(0.27,0.42)     |
| EBI x X                 | 3.17**<br>(1.15,5.18)        | -1.16<br>(-3.08,0.76)            | -4.02*<br>(-7.65,-0.39)    |
| Phase1 x X              | -0.29***<br>(-0.31,-0.26)    | -0.06***<br>(-0.08,-0.03)        | -3.07***<br>(-3.18,-2.97)  |
| EBI x Phase1 x X        | -0.05***<br>(-0.07,-0.04)    | -0.01<br>(-0.02,0.01)            | -0.24***<br>(-0.32,-0.16)  |
| Constant                | 4.15***<br>(4.05,4.26)       | 4.19***<br>(4.09,4.30)           | 2.84***<br>(2.75,2.92)     |
| Observations            | 6750                         | 6750                             | 16559                      |
| Unit of<br>Observations | 135 CCGs                     | 135 CCGs                         | 382 Hospitals              |

Co-efficients are reported as percentages, and can be understood as follows: *Phase1* is the percentage difference in change in volumes between the treatment and control group. *EBI* is the percentage difference in volumes for all procedures before and after the implementation of the EBI programme. *EBI x Phase1* is the percentage difference in difference of volumes before and after the implementation of the EBI programme between the treatment and control group. *EBI x X* is the average percentage difference in difference in volumes for all procedures before and after the implementation of the EBI programme between different organisational characteristics defined by *X*. *Phase1 x X* is average percentage difference in changes in volumes for the treatment group for different organisational characteristics defined by *X*. *EBI x Phase1 x X* is the average percentage difference in difference in volumes before and after the implementation of the EBI programme for the treatment group between different organisational characteristics defined by *X*. In Model 1, *X* is 1 for CCGs which posted in financial year 2018/19, and 0 for those which did not. In Model 2, *X* is 1 for CCGs which were part of the demonstrator community, and 0 for those which were not. In Model 3, *X* is 1 for NHS hospitals and 0 for independent sector providers. 95% Confidence intervals in parentheses, \*\*\*  $p < 0.001$ , \*\*  $p < 0.01$ , \*  $p < 0.05$ . All models used fixed effects therefore errors are clustered at the CCG or hospital level. This table was created by the co-authors of this manuscript.

## References

- 1 NHS England. Evidence-Based Interventions: Guidance for CCGs. 2018.  
<https://www.evidence.nhs.uk/document?id=2128996&returnUrl=search%3Fq%3Dpolicy%2Bon%2Bchronic%2Bshoulder%2Bpain> (accessed Feb 22, 2022).
- 2 Academy of Medical Royal Colleges. Evidence-Based Interventions List 2 Guidance. 2020.  
[https://www.aomrc.org.uk/wp-content/uploads/2020/12/EBI\\_list2\\_guidance\\_150321.pdf](https://www.aomrc.org.uk/wp-content/uploads/2020/12/EBI_list2_guidance_150321.pdf) (accessed Feb 22, 2022).
